# Supplementary material
Source: MDPI journal article supplement (https://www.mdpi.com/1996-1073/16/9/3643)
Supplement: s1 [file s1]

## Supplementary Materials

Green anisole solvent-based synthesis and Deposition of phthalocyanine dopant-free hole-transport materials for perovskite solar cells

Suresh K. Podapangi <sup>1</sup>, Laura Mancini <sup>2</sup>, Jie Xu <sup>1</sup>, Sathy Harshavardhan Reddy <sup>1</sup>, Aldo Di Carlo <sup>1,3</sup>, Thomas M. Brown <sup>1</sup> and Gloria Zanotti <sup>2,\*</sup>

<sup>1</sup> C.H.O.S.E. (Centre for Hybrid and Organic Solar Energy), Department of Electronic Engineering University of Rome-Tor Vergata, via del Politecnico 1, 00133, Rome, Italy; suresh.podapangi@uniroma2.it, xuxjie01@uniroma2.it, sathy@ing.uniroma2.it, thomas.brown@uniroma2.it

<sup>2</sup> Istituto di Struttura della Materia - CNR (ISM-CNR), Area della Ricerca Roma1, Via Salaria km 29.300, 00015 Monterotondo, Italy; laura.mancini@mib.ism.cnr.it, gloria.zanotti@ism.cnr.it

<sup>3</sup> Istituto di Struttura della Materia–CNR (ISM-CNR), Area della Ricerca di Roma Tor Vergata, Via del Fosso del Cavaliere 100, 00133 Rome, Italy; aldo.dicarlo@ism.cnr.it

## Index

|                                                                                                   |      |
|---------------------------------------------------------------------------------------------------|------|
| Figure S1: $^1\text{H}$ NMR of TBU4-Zn.....                                                       | p.2  |
| Figure S2a: IR spectrum of TBU4-Co.....                                                           | p.3  |
| Figure S2b: IR spectrum of TBU4-Cu.....                                                           | p.3  |
| Figure S2c: IR spectrum of TBU4-Zn.....                                                           | p.3  |
| Figure S3a: ESI-MS spectrum of TBU4-Co.....                                                       | p.4  |
| Figure S3b: ESI-MS spectrum of TBU4-Cu.....                                                       | p.4  |
| Figure S3c: ESI-MS spectrum of TBU4-Zn.....                                                       | p.4  |
| Figure S4a: Cyclic voltammogram (anodic scan) of TBU4-Co.....                                     | p.5  |
| Figure S4b: Cyclic voltammogram (anodic scan) of TBU4-Cu.....                                     | p.5  |
| Figure S4c: Cyclic voltammogram (anodic scan) of TBU4-Zn.....                                     | p.5  |
| Table S1: Prices of quoted materials.....                                                         | p.6  |
| Figure S5: Flowcharts for the syntheses of 1.000 g of target phthalocyanines.....                 | p.7  |
| Figure S6: Solutions of various HTMs in chlorobenzene and anisole.....                            | p.8  |
| Figure S7: UV-vis absorption spectra of TBU4-Co, TBU4-Zn, TBU4-Cu thin films on perovskite.. ..   | p.8  |
| Figure S8: Current density vs voltage curves of anisole- and chlorobenzene-based HTM devices..... | p.9  |
| Figure S9: Statistical evaluation box charts of anisole- and chlorobenzene-based devices. ....    | p.9  |
| Figure S10: Surface morphologies with roughness values of target phthalocyanines....              | p.10 |

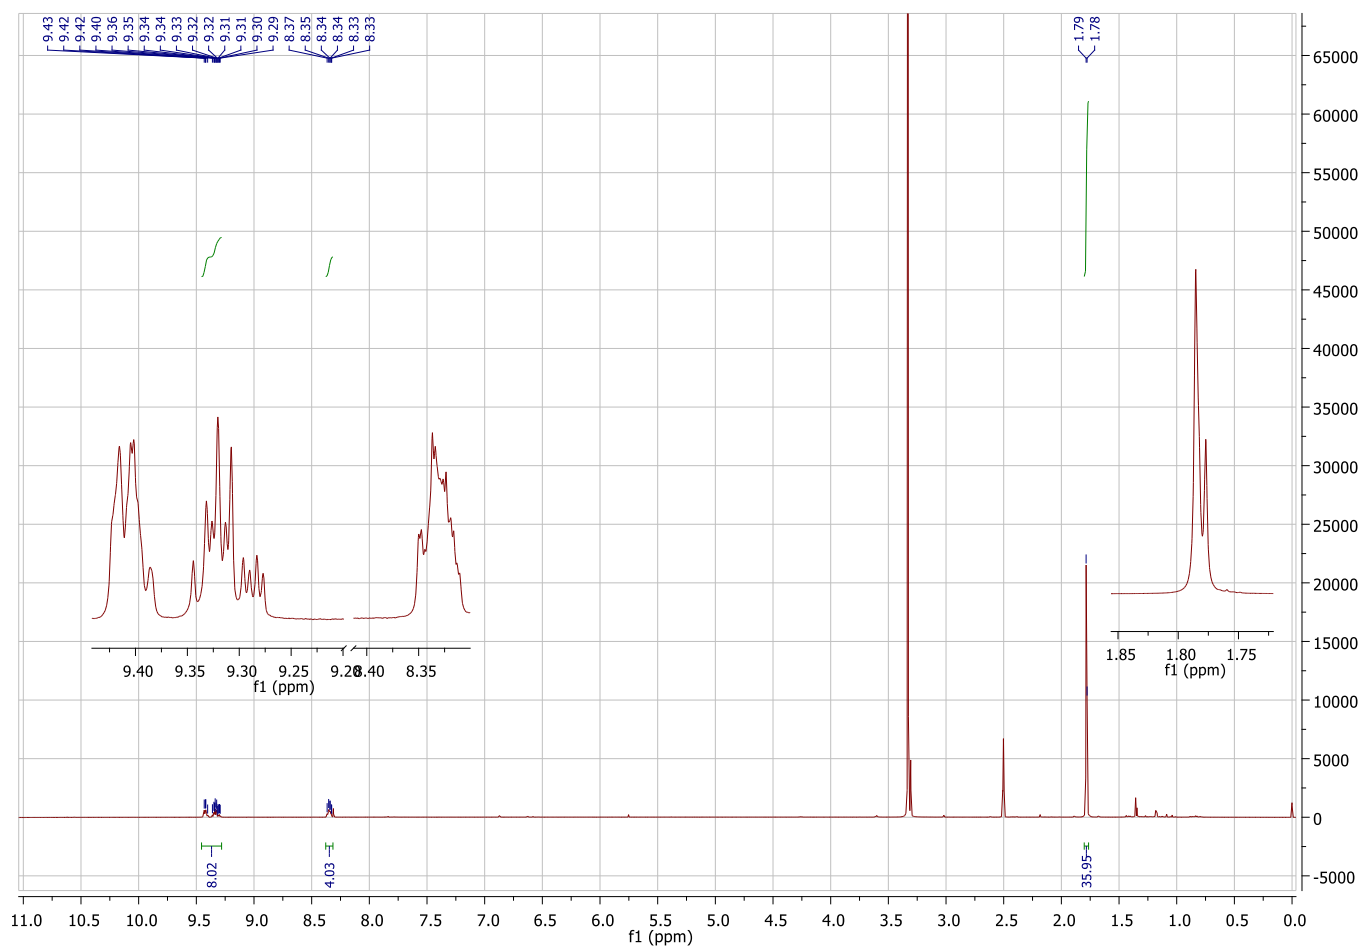

**Figure S1:**  $^1\text{H}$  NMR of TBU4-Zn in DMSO- $d_6$ .

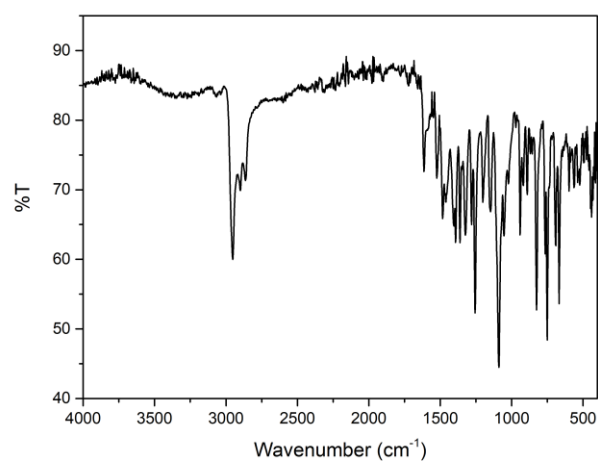

**Figure S2a:** IR spectrum of TBU4-Co.

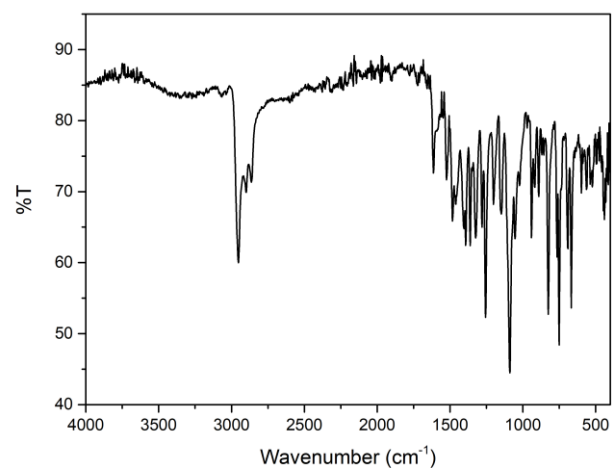

**Figure S2b:** IR spectrum of TBU4-Cu.

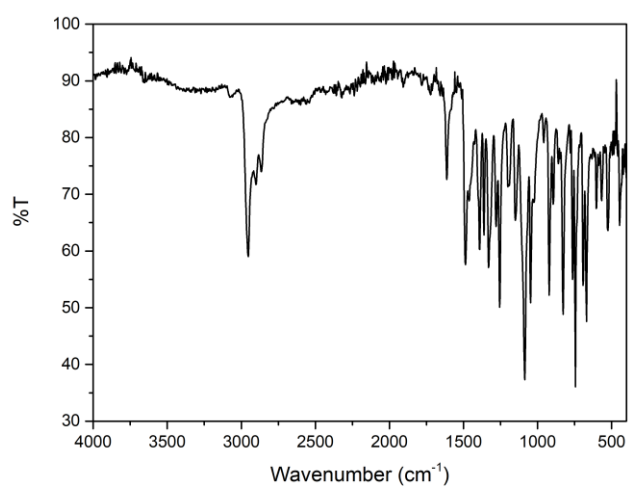

**Figure S2c:** IR spectrum of TBU4-Zn.

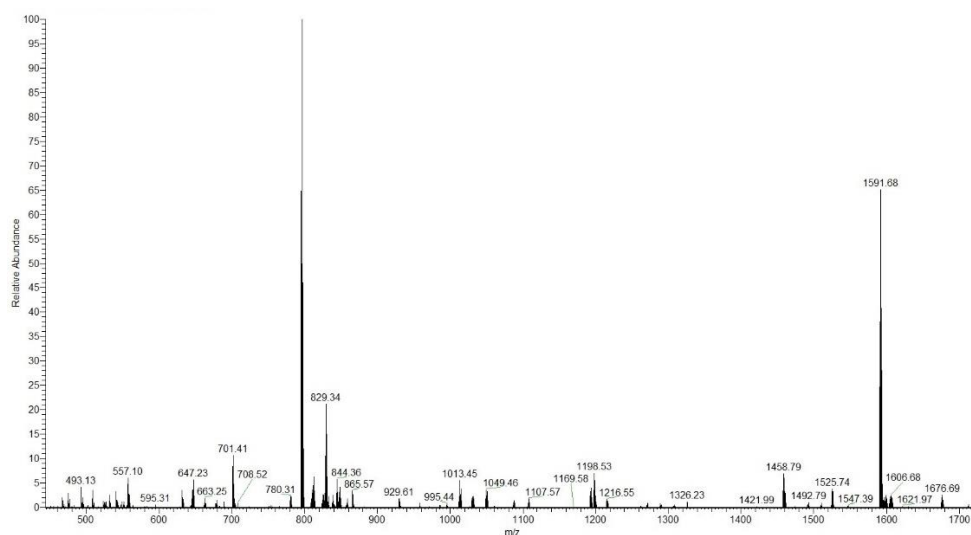

**Figure S3a:** ESI-MS spectrum of TBU4-Co.

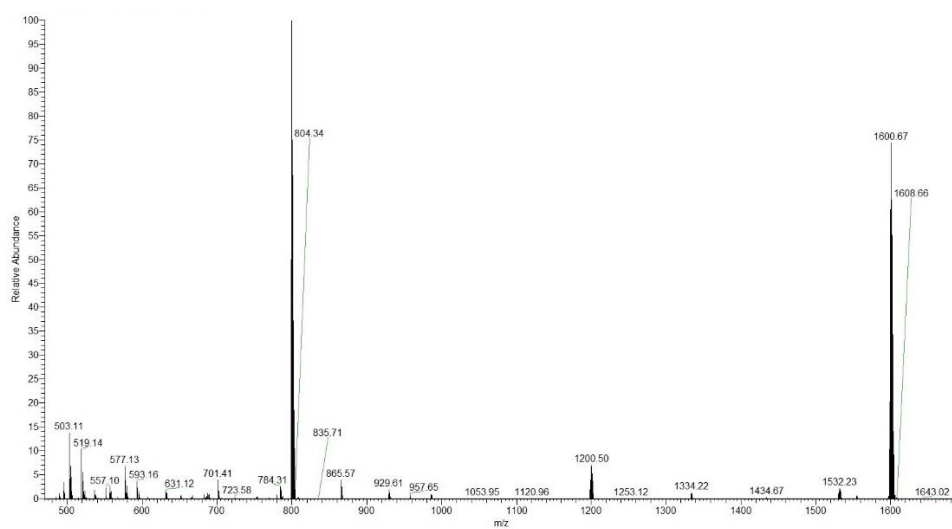

**Figure S3b:** ESI-MS spectrum of TBU4-Cu.

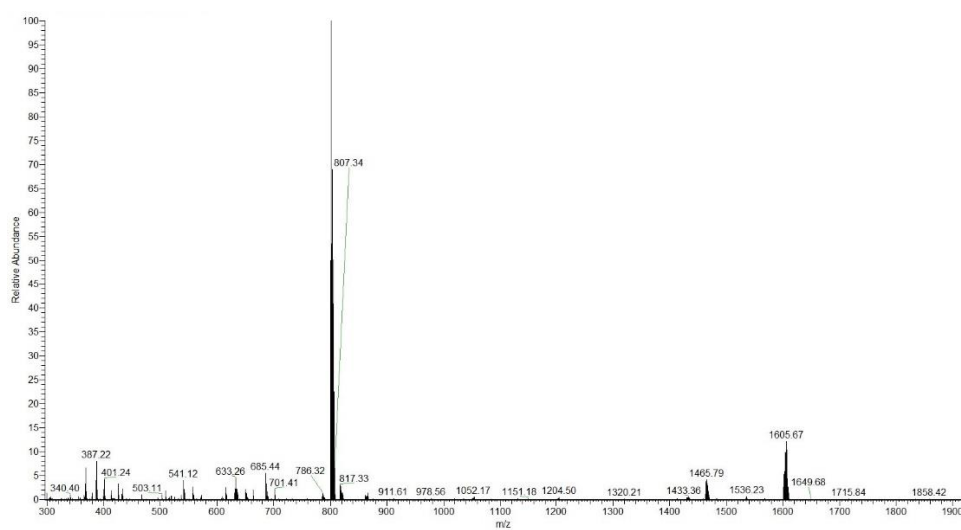

**Figure S3c:** ESI-MS spectrum of TBU4-Zn.

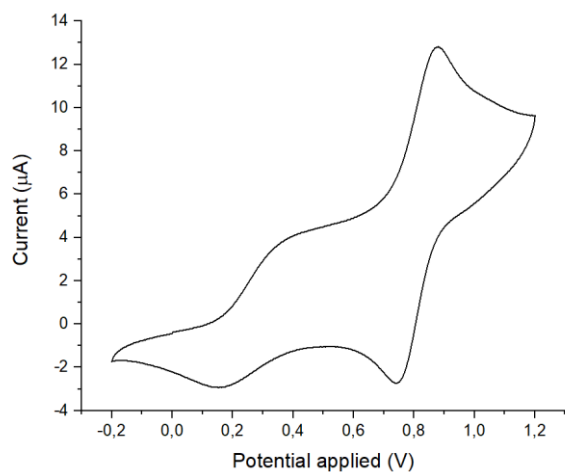

**Figure S4a:** TBU4-Co anodic scan in dichloromethane. Scan rate  $0.1 \text{ Vs}^{-1}$ . The reference  $\text{Fc}^+/\text{Fc}$  couple gave a potential of 0.43 V.

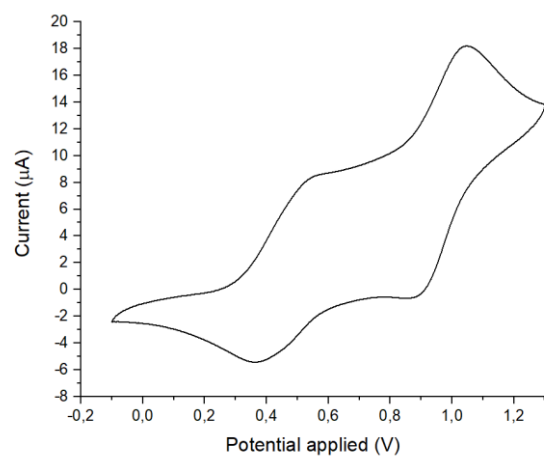

**Figure S4b:** TBU4-Cu anodic scan in dichloromethane. Scan rate  $0.1 \text{ Vs}^{-1}$ . The reference  $\text{Fc}^+/\text{Fc}$  couple gave a potential of 0.43 V.

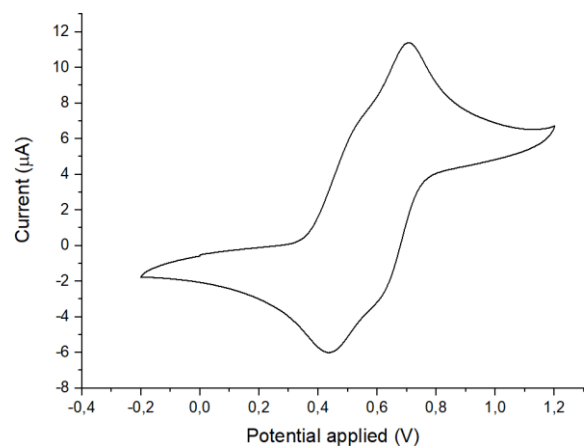

**Figure S4c:** TBU4-Zn anodic scan in dichloromethane. Scan rate  $0.05 \text{ Vs}^{-1}$ . The reference  $\text{Fc}^+/\text{Fc}$  couple gave a potential of 0.43 V.

## Cost analysis

For the sake of simplicity, Merck has been chosen as the only supplier for reagents, solvents, and purification materials (<https://www.sigmaaldrich.com/IT/it>) except for 4-*tert*-butylphthalonitrile that has been quoted from TCI chemicals (<https://www.tcichemicals.com/IT/en/>). In all cases, the bulkiest batches available on the online catalogs at a sufficient degree of purity have been chosen and the product number of each chemical has been reported in Table S1 for sake of clarity. The costs of our syntheses have been estimated by calculating the required amounts of chemicals to produce 1 gram of the desired phthalocyanine in the respective yields (see the synthesis flowcharts in Figures S5 a,b,c) and multiplying them by their current prices, rounded to the nearest cent. Prices have been checked on March 10<sup>th</sup>, 2023.

The density of HCl 1N has been approximated to 1.00 g/cm<sup>3</sup>.

**Table S1:** Overview of the quoted materials

| Reagent                                                                  | quoted price (EUR) | size                | EUR/g |
|--------------------------------------------------------------------------|--------------------|---------------------|-------|
| 4- <i>tert</i> -butylphthalonitrile<br>B1334                             | 368.00             | 25g                 | 14.72 |
| Co(OAc) <sub>2</sub> ·4H <sub>2</sub> O<br>208396-1KG                    | 439.00             | 1.0 kg              | 0.44  |
| Cu(OAc) <sub>2</sub> ·H <sub>2</sub> O<br>341746-2.5KG                   | 406.00             | 2.5 kg              | 0.16  |
| Zn(OAc) <sub>2</sub> ·2H <sub>2</sub> O<br>383058-2.5KG                  | 470.00             | 2.5 kg              | 0.19  |
| DBU<br>8032829050<br>d= 1.02 g/cm <sup>3</sup>                           | 2770.00            | 50 kg               | 0.055 |
| Anisole<br>8014529025<br>d= 0.995 g/cm <sup>3</sup>                      | 791.00             | 25 L<br>24.875 kg   | 0.032 |
| Propane-1,2-diol<br>W294004-25KG-K<br>d= 1.035 - 1.040 g/cm <sup>3</sup> | 286.00             | 25 kg               | 0.011 |
| Methanol<br>179337-200L<br>d= 0.791 g/cm <sup>3</sup>                    | 1880.00            | 200 L<br>158.200 kg | 0.012 |
| HCl<br>30721-2.5L-M<br>d= 1.2 g/cm <sup>3</sup>                          | 47.00              | 2.5 L<br>3.0 kg     | 0.016 |
| Silica gel<br>60741-25KG                                                 | 1610.00            | 25 kg               | 0.064 |
| Petroleum ether 50-70<br>1009106025<br>d= 0.662 g/cm <sup>3</sup>        | 856.00             | 25 L<br>16.55 kg    | 0.052 |
| THF<br>360589-20L<br>d= 0.89 g/cm <sup>3</sup>                           | 827.00             | 20 L<br>17.80 kg    | 0.047 |
| Chlorobenzene<br>8017919025<br>d= 1.11 g/cm <sup>3</sup>                 | 307.00             | 25L<br>27750 kg     | 0.011 |

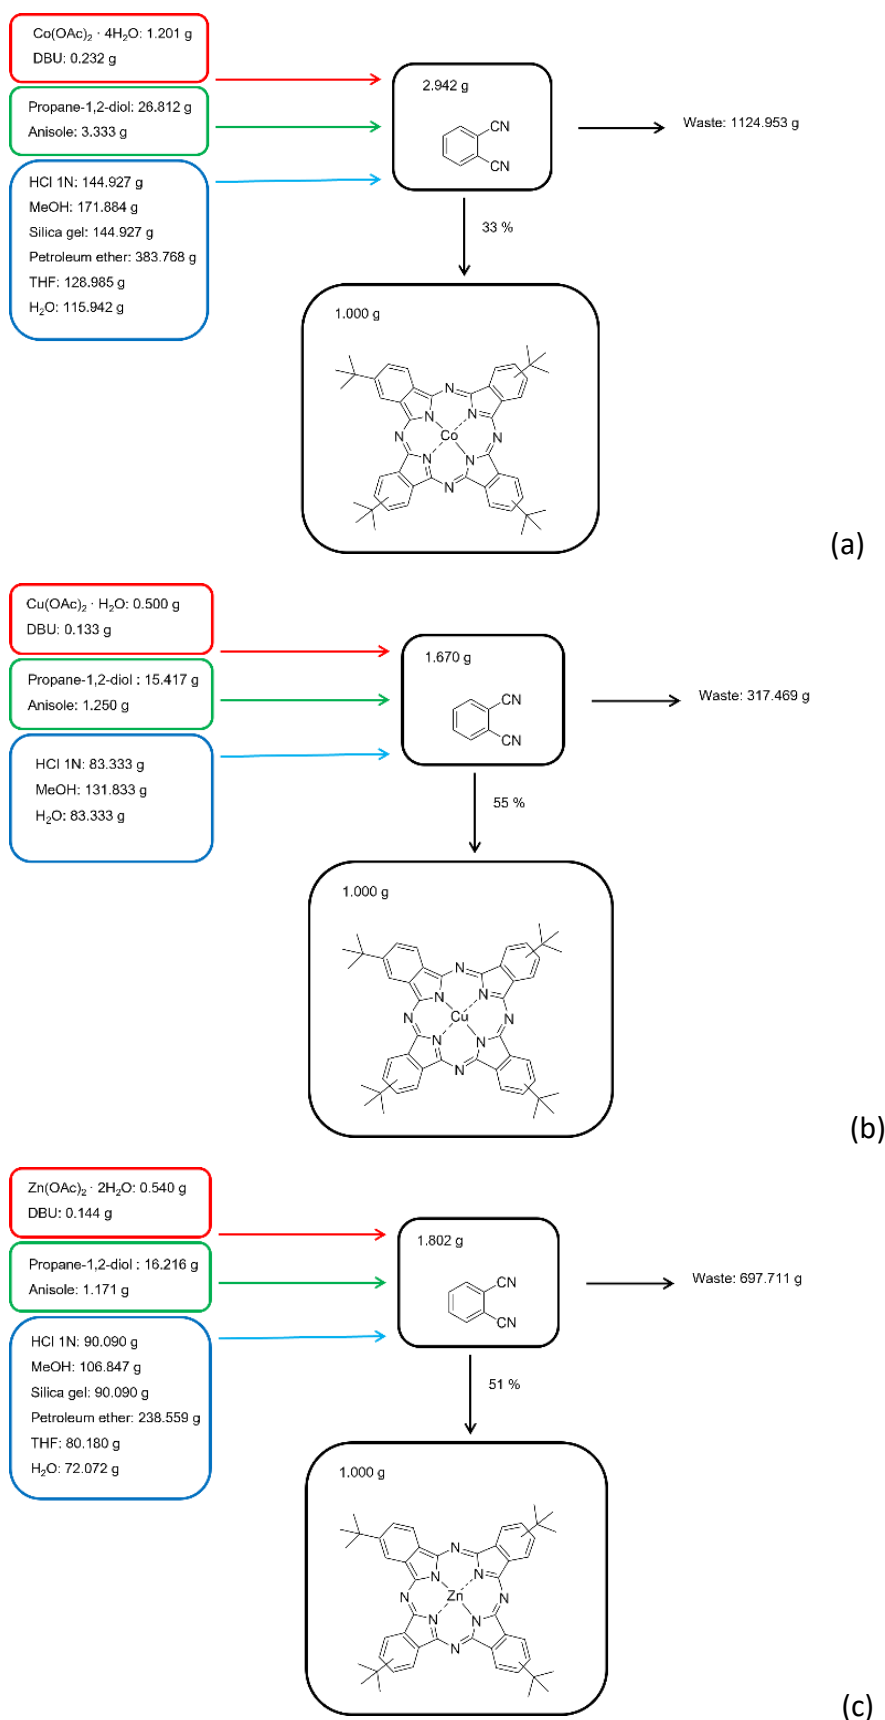

**Figure S5:** Flowcharts for the synthesis of 1.000 g of (a) TBU4-Co, (b) TBU4-Cu and (c) TBU4-Zn. Reagents are highlighted in red, solvents are highlighted in green and workup/purification materials are highlighted in blue.



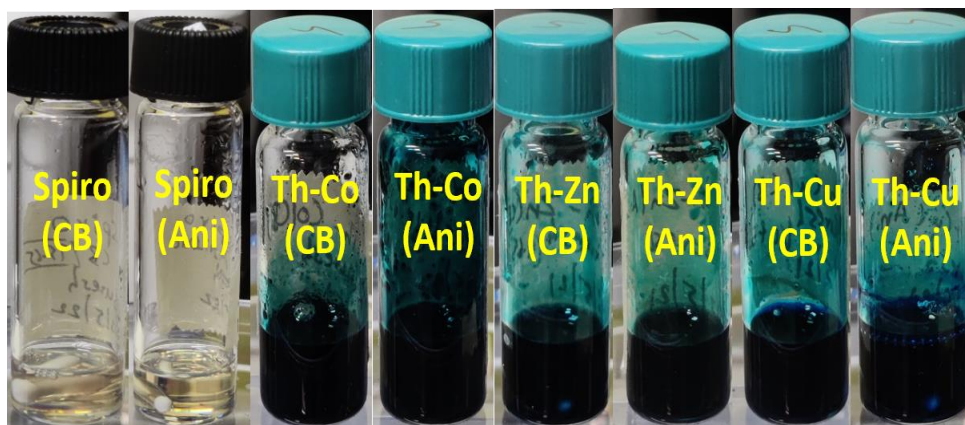

**Figure S6:** Solutions of Various HTMs with Chlorobenzene (CB), Anisole (Ani).

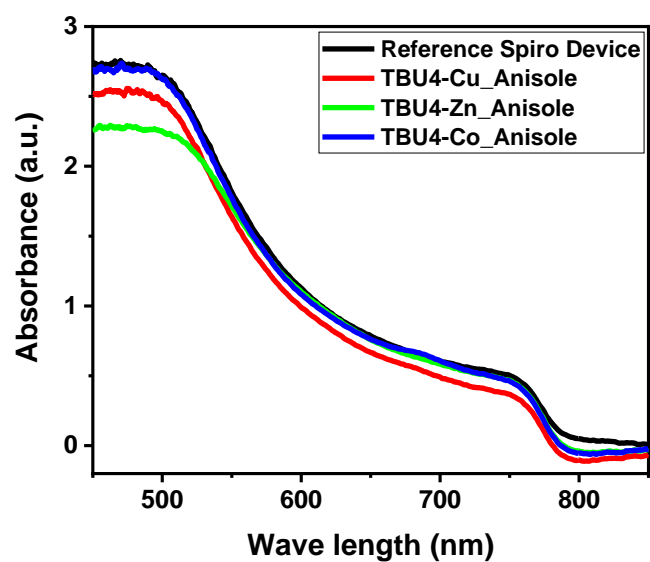

**Figure S7:** UV absorption spectra of various HTMs thin films on perovskite (TBU4-Co, TBU4-Zn, TBU4-Cu).

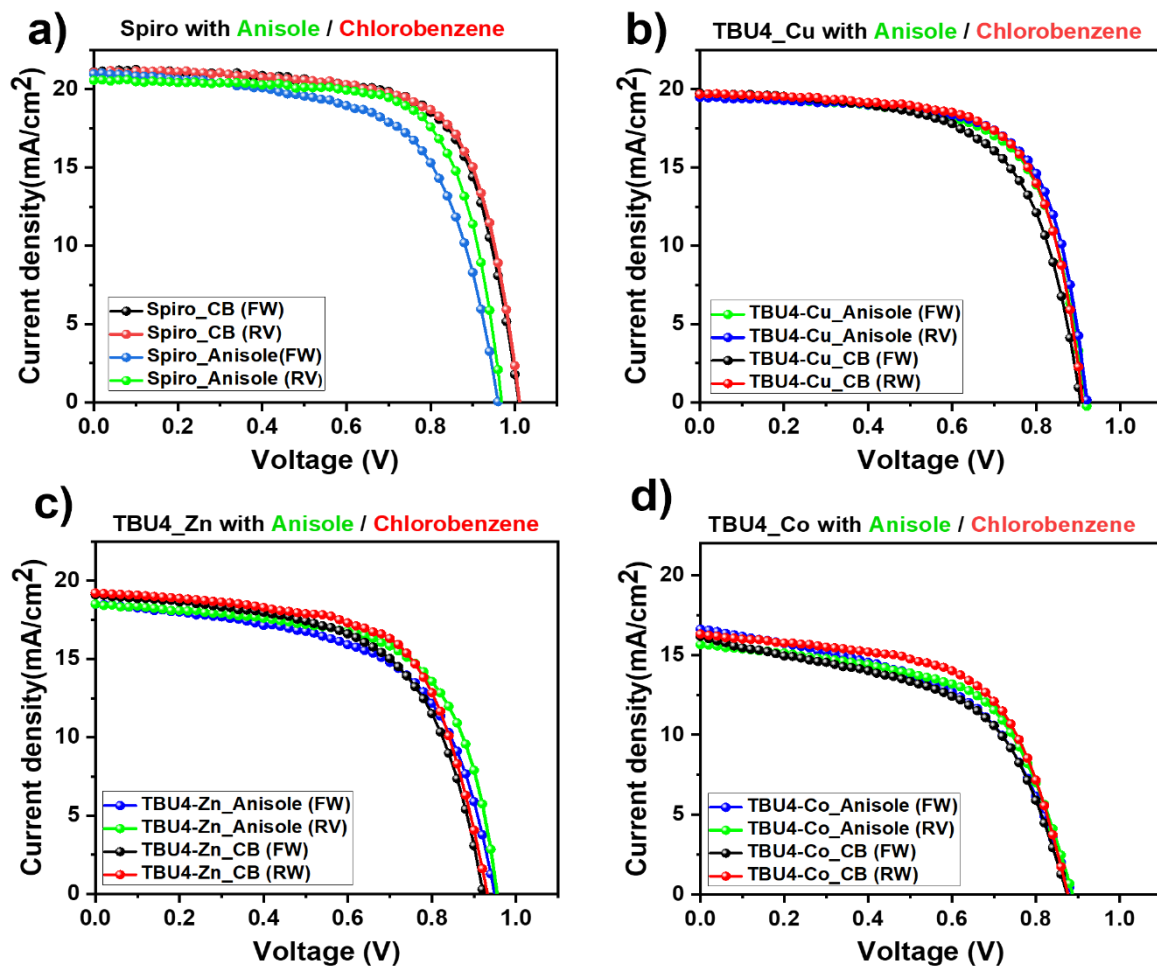

**Figure S8:** Anisole- and chlorobenzene-based HTM devices Current density vs voltage curves a) Spiro devices, b) TBU4-Cu devices, c) TBU4-Zn devices, d) TBU4-Co devices.

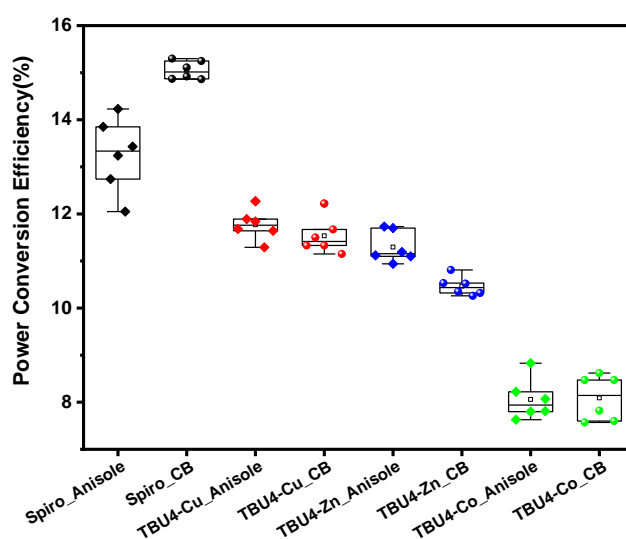

**Figure S9:** Statistical evaluation box charts of anisole- and chlorobenzene-based devices (6 samples for each).

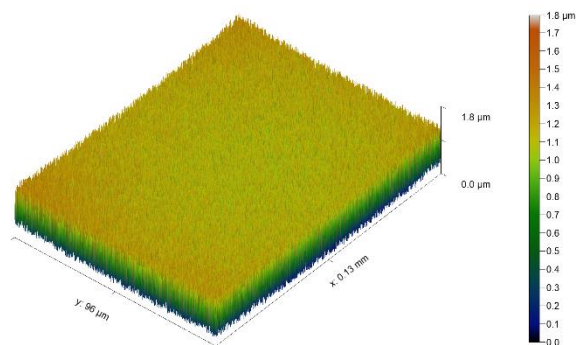

(a) TBU4-Cu Roughness  $345.0 \pm 7.8$  nm

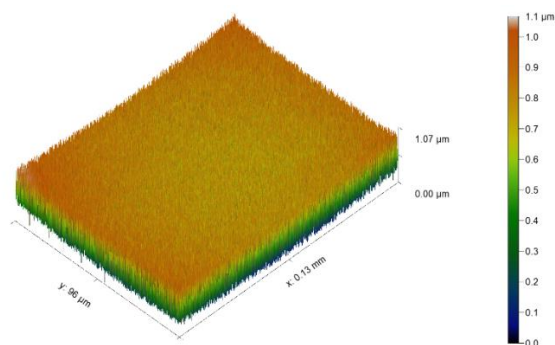

(b) TBU4-Zn Roughness  $230.3 \pm 5.2$  nm

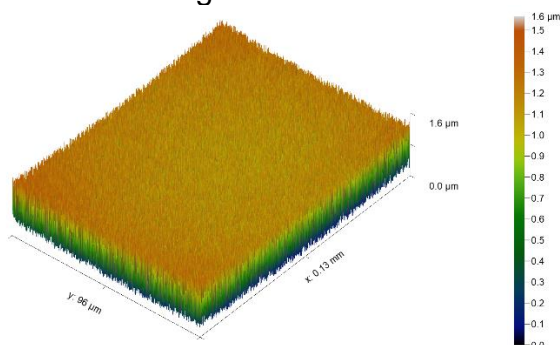

(c) TBU4-Co Roughness  $343.6 \pm 7.7$  nm

**Figure S10:** Surface morphologies with roughness values for a) TBU4-Cu, b) TBU4-Zn, c) TBU4-Co.

Optical images were obtained by Olympus Lext OLS 3100 confocal microscope. Confocal microscopy provides a topographic map by transforming a series of optical sections taken from the surface that can be used to measure surface roughness. Surface roughness measurement from this technique is proved to be comparable to stylus instruments. Gwyddion software was used to calculate surface roughness from confocal microscopy results.
